# Supplementary material for: Effect of Different Types of Face Masks on the Ventilatory and Cardiovascular Response to Maximal-Intensity Exercise
Source: MDPI journal article supplement (doi:10.3390/biology10100969), 2021-09-27
Supplement: s1 [file s1]

**Table S1.** Effect of interaction for ergospirometry variables and subjective scales expressed as mean  $\pm$  standard error of the mean (SEM).

|                           |                  | Rest            | Warm-up         | VT1             | VT2             | Max             | 120s Rec        | 300s Rec        | F     | p     | $\eta^2$ |
|---------------------------|------------------|-----------------|-----------------|-----------------|-----------------|-----------------|-----------------|-----------------|-------|-------|----------|
| RER                       | ErgoMask         | 0.76 $\pm$ 0.01 | 0.72 $\pm$ 0.02 | 0.81 $\pm$ 0.02 | 0.98 $\pm$ 0.02 | 1.15 $\pm$ 0.01 | 1.28 $\pm$ 0.02 | 1.05 $\pm$ 0.01 | 1.838 | 0.189 | 0.133    |
|                           | ErgoMask+FFP2    | 0.82 $\pm$ 0.02 | 0.78 $\pm$ 0.02 | 0.78 $\pm$ 0.02 | 0.94 $\pm$ 0.02 | 1.23 $\pm$ 0.11 | 1.21 $\pm$ 0.02 | 1.02 $\pm$ 0.01 |       |       |          |
|                           | ErgoMask+Emotion | 0.85 $\pm$ 0.02 | 0.80 $\pm$ 0.02 | 0.79 $\pm$ 0.02 | 0.97 $\pm$ 0.01 | 1.15 $\pm$ 0.01 | 1.25 $\pm$ 0.03 | 1.05 $\pm$ 0.02 |       |       |          |
| VE/VO <sub>2</sub>        | ErgoMask         | 33.0 $\pm$ 1.0  | 28.5 $\pm$ 1.0  | 26.2 $\pm$ 0.5  | 31.3 $\pm$ 1.0  | 34.9 $\pm$ 1.5  | 45.2 $\pm$ 1.7  | 41.6 $\pm$ 1.5  | 1.898 | 0.065 | 0.137    |
|                           | ErgoMask+FFP2    | 31.5 $\pm$ 1.0  | 26.3 $\pm$ 0.8  | 23.0 $\pm$ 0.7  | 26.6 $\pm$ 1.0  | 29.0 $\pm$ 1.0  | 38.5 $\pm$ 1.1  | 36.4 $\pm$ 1.0  |       |       |          |
|                           | ErgoMask+Emotion | 35.2 $\pm$ 1.1  | 28.3 $\pm$ 0.8  | 24.3 $\pm$ 0.8  | 30.0 $\pm$ 0.9  | 33.1 $\pm$ 1.2  | 42.9 $\pm$ 1.6  | 39.8 $\pm$ 1.5  |       |       |          |
| VE/VCO <sub>2</sub>       | ErgoMask         | 43.7 $\pm$ 1.3  | 39.4 $\pm$ 1.2  | 32.5 $\pm$ 0.7  | 32.0 $\pm$ 0.9  | 30.3 $\pm$ 1.1  | 35.4 $\pm$ 1.1  | 39.5 $\pm$ 1.2  | 0.769 | 0.681 | 0.060    |
|                           | ErgoMask+FFP2    | 38.5 $\pm$ 1.4  | 34.0 $\pm$ 0.9  | 29.5 $\pm$ 0.7  | 28.4 $\pm$ 0.7  | 26.1 $\pm$ 0.8  | 31.8 $\pm$ 0.5  | 35.7 $\pm$ 1.1  |       |       |          |
|                           | ErgoMask+Emotion | 41.5 $\pm$ 1.2  | 35.7 $\pm$ 0.9  | 30.7 $\pm$ 0.9  | 30.9 $\pm$ 0.8  | 28.9 $\pm$ 1.0  | 34.3 $\pm$ 0.7  | 37.9 $\pm$ 1.2  |       |       |          |
| Breathing frequency (bpm) | ErgoMask         | 21.3 $\pm$ 1.2  | 28.2 $\pm$ 1.2  | 37.8 $\pm$ 1.8  | 44.8 $\pm$ 2.0  | 55.1 $\pm$ 2.1  | 38.5 $\pm$ 1.7  | 36.2 $\pm$ 2.0  | 1.025 | 0.419 | 0.079    |
|                           | ErgoMask+FFP2    | 18.3 $\pm$ 1.1  | 24.4 $\pm$ 1.5  | 31.3 $\pm$ 2.1  | 37.5 $\pm$ 2.1  | 50.4 $\pm$ 2.0  | 33.9 $\pm$ 1.4  | 33.0 $\pm$ 1.4  |       |       |          |
|                           | ErgoMask+Emotion | 19.9 $\pm$ 0.8  | 25.5 $\pm$ 1.2  | 32.7 $\pm$ 1.9  | 43.3 $\pm$ 2.1  | 52.6 $\pm$ 2.4  | 38.1 $\pm$ 1.5  | 34.8 $\pm$ 1.9  |       |       |          |
| Tins (s)                  | ErgoMask         | 1.18 $\pm$ 0.12 | 1.01 $\pm$ 0.05 | 0.79 $\pm$ 0.04 | 0.70 $\pm$ 0.03 | 0.56 $\pm$ 0.03 | 0.73 $\pm$ 0.03 | 0.76 $\pm$ 0.04 | 0.717 | 0.654 | 0.056    |
|                           | ErgoMask+FFP2    | 1.38 $\pm$ 0.12 | 1.22 $\pm$ 0.09 | 1.03 $\pm$ 0.07 | 0.91 $\pm$ 0.06 | 0.64 $\pm$ 0.04 | 0.86 $\pm$ 0.04 | 0.88 $\pm$ 0.04 |       |       |          |
|                           | ErgoMask+Emotion | 1.21 $\pm$ 0.06 | 1.13 $\pm$ 0.06 | 0.96 $\pm$ 0.05 | 0.75 $\pm$ 0.05 | 0.59 $\pm$ 0.03 | 0.73 $\pm$ 0.03 | 0.81 $\pm$ 0.04 |       |       |          |
| Texp (s)                  | ErgoMask         | 1.87 $\pm$ 0.15 | 1.26 $\pm$ 0.10 | 0.84 $\pm$ 0.05 | 0.67 $\pm$ 0.04 | 0.56 $\pm$ 0.02 | 0.87 $\pm$ 0.06 | 0.98 $\pm$ 0.07 | 1.420 | 0.251 | 0.106    |
|                           | ErgoMask+FFP2    | 2.35 $\pm$ 0.22 | 1.45 $\pm$ 0.10 | 0.99 $\pm$ 0.09 | 0.76 $\pm$ 0.05 | 0.58 $\pm$ 0.02 | 0.95 $\pm$ 0.04 | 0.98 $\pm$ 0.05 |       |       |          |
|                           | ErgoMask+Emotion | 1.94 $\pm$ 0.15 | 1.37 $\pm$ 0.07 | 0.95 $\pm$ 0.06 | 0.68 $\pm$ 0.03 | 0.58 $\pm$ 0.03 | 0.88 $\pm$ 0.04 | 0.98 $\pm$ 0.07 |       |       |          |
| Breathing reserve (%)     | ErgoMask         | 89.2 $\pm$ 0.9  | 82.4 $\pm$ 1.2  | 60.3 $\pm$ 1.7  | 38.5 $\pm$ 3.3  | 20.4 $\pm$ 2.4  | 52.1 $\pm$ 3.4  | 62.9 $\pm$ 3.0  | 1.050 | 0.408 | 0.087    |
|                           | ErgoMask+FFP2    | 88.8 $\pm$ 0.6  | 79.6 $\pm$ 1.1  | 60.3 $\pm$ 2.1  | 40.8 $\pm$ 2.4  | 25.5 $\pm$ 4.4  | 52.8 $\pm$ 2.6  | 63.1 $\pm$ 2.8  |       |       |          |
|                           | ErgoMask+Emotion | 90.8 $\pm$ 0.7  | 84.2 $\pm$ 0.7  | 66.1 $\pm$ 1.4  | 44.8 $\pm$ 2.2  | 27.2 $\pm$ 4.2  | 55.0 $\pm$ 2.4  | 67.9 $\pm$ 2.1  |       |       |          |

|                        |                         |           |           |              |              |              |         |           |       |       |       |
|------------------------|-------------------------|-----------|-----------|--------------|--------------|--------------|---------|-----------|-------|-------|-------|
| HR (ppm)               | <b>ErgoMask</b>         | 67 ± 4.5  | 107 ± 3   | 150 ± 4      | 175 ± 3      | 178 ± 5      | 130 ± 5 | 117 ± 4   | 2.54  | 0.059 | 0.175 |
|                        | <b>ErgoMask+FFP2</b>    | 90 ± 4.3  | 109 ± 3   | 146 ± 3      | 170 ± 4      | 178 ± 3      | 132 ± 5 | 117 ± 5   |       |       |       |
|                        | <b>ErgoMask+Emotion</b> | 69 ± 8.8  | 105 ± 2   | 146 ± 3      | 171 ± 3      | 180 ± 2      | 132 ± 4 | 119 ± 4   |       |       |       |
| Time to exhaustion (s) | <b>ErgoMask</b>         | -         | -         | 335.4 ± 13.3 | 543.8 ± 15.9 | 685.9 ± 15.4 | -       | -         | 2.559 | 0.094 | 0.176 |
|                        | <b>ErgoMask+FFP2</b>    | -         | -         | 313.1 ± 5.8  | 485.4 ± 14.6 | 678.7 ± 17.0 | -       | -         |       |       |       |
|                        | <b>ErgoMask+Emotion</b> | -         | -         | 320.0 ± 7.8  | 527.7 ± 14.5 | 712.5 ± 12.3 | -       | -         |       |       |       |
| Speed (km/h)           | <b>ErgoMask</b>         | -         | -         | 9.4 ± 0.2    | 12.8 ± 0.3   | 15.0 ± 0.3   | -       | -         | 1.867 | 0.132 | 0.135 |
|                        | <b>ErgoMask+FFP2</b>    | -         | -         | 9.0 ± 0.1    | 11.9 ± 0.2   | 14.8 ± 0.3   | -       | -         |       |       |       |
|                        | <b>ErgoMask+Emotion</b> | -         | -         | 9.2 ± 0.1    | 12.6 ± 0.2   | 15.1 ± 0.3   | -       | -         |       |       |       |
| VAS VE (0-10)          | <b>ErgoMask</b>         | 8.7 ± 0.4 | 8 ± 0.6   | -            | -            | 5.3 ± 0.8    | -       | 8 ± 0.5   | 1.211 | 0.320 | 0.108 |
|                        | <b>ErgoMask+FFP2</b>    | 5.8 ± 0.8 | 5.9 ± 0.6 | -            | -            | 4.3 ± 0.9    | -       | 5.9 ± 0.7 |       |       |       |
|                        | <b>ErgoMask+Emotion</b> | 7.9 ± 0.3 | 7.2 ± 0.4 | -            | -            | 5.3 ± 0.8    | -       | 6.9 ± 0.5 |       |       |       |
| RPE (0-10)             | <b>ErgoMask</b>         | 0.3 ± 0.2 | 0.9 ± 0.3 | -            | -            | 7.9 ± 0.5    | -       | 2.6 ± 0.5 | 0.337 | 0.915 | 0.033 |
|                        | <b>ErgoMask+FFP2</b>    | 0.3 ± 0.1 | 1.3 ± 0.3 | -            | -            | 8.0 ± 0.3    | -       | 2.7 ± 0.6 |       |       |       |
|                        | <b>ErgoMask+Emotion</b> | 0.2 ± 0.1 | 1.2 ± 0.3 | -            | -            | 8.0 ± 0.4    | -       | 2.8 ± 0.5 |       |       |       |

**Note.** ErgoMask: Ergospirometry Mask; ErgoMask+FFP2: Ergospirometry Mask + FFP2; ErgoMask+Emotion: Ergospirometry Mask + Emotion; VE: Ventilation; VO<sub>2</sub>: Oxygen consumption; VCO<sub>2</sub>: Carbon dioxide production; RER: Respiratory exchange ratio; Tins: Inspiratory time; Texp: Expiratory time; HR: Heart rate; VAS VE: Ventilation visual analogue scale; RPE: Rate of perceived exertion.
